# Supplementary material for: Acoustic tweezers via sub–time-of-flight regime surface acoustic waves
Source: PubMed Central journal article supplement — Sci Adv. 2016 Jul 13;2(7):e1600089. doi: 10.1126/sciadv.1600089 (PMC4956186; doi:10.1126/sciadv.1600089), 2016-07-13
Supplement: 1600089_SM.pdf [file 1600089_SM.pdf]

## Supplementary Materials for

### **Acoustic tweezers via sub–time-of-flight regime surface acoustic waves**

David J. Collins, Citsabehsan Devendran, Zhichao Ma, Jia Wei Ng, Adrian Neild, Ye Ai

Published 13 July 2016, *Sci. Adv.* **2**, e1600089 (2016)

DOI: 10.1126/sciadv.1600089

#### **The PDF file includes:**

- Legends for movies S1 to S4

#### **Other Supplementary Material for this manuscript includes the following:**

(available at [advances.sciencemag.org/cgi/content/full/2/7/e1600089/DC1](http://advances.sciencemag.org/cgi/content/full/2/7/e1600089/DC1))

- movie S1 (.avi format). Development of localized acoustic patterning region.
- movie S2 (.avi format). Numerical simulation of pulsed SAW, including 2D and 3D models of the piezoelectric substrate and a model of the acoustofluidic interaction.
- movie S3 (.avi format). Analytical model of sub-TOF regime SAW.
- movie S4 (.avi format). Generation of time-averaged localized patterning regions using 50-, 100-, 200-, and 300-ns pulses.

## Supplementary Materials

**movie S1. Development of localized acoustic patterning region.** Intersecting nanosecond-scale SAW pulses generate a local standing wave field in the direction of acoustic propagation. This field can be used for localized acoustic tweezers, where particles outside of the principle patterning region are not substantially unaffected. The pulses are generated using a 40  $\mu\text{m}$  wavelength SAW device actuated at 96 MHz.

**movie S2. Numerical simulation of pulsed SAW, including 2D and 3D models of the piezoelectric substrate and a model of the acoustofluidic interaction.**

**movie S3. Analytical model of sub-TOF regime SAW.** Pulses in this regime result in a localized region of time-averaged substrate displacements. Multiple pulses within this limit result in a discrete number of spatially distinct patterning regions.

**movie S4. Generation of time-averaged localized patterning regions using 50-, 100-, 200-, and 300-ns pulses.** In each case the pulses are generated using a 40  $\mu\text{m}$  wavelength SAW device actuated at 96 MHz.
